# Supplementary material for: Global distribution of nearshore slopes with implications for coastalretreat
Source: Copernicus journal article supplement (doi:10.5194/essd-2019-71), 2019-05-27
Supplement: Supplementary file 1 [file essd-2019-71-supplement.pdf]

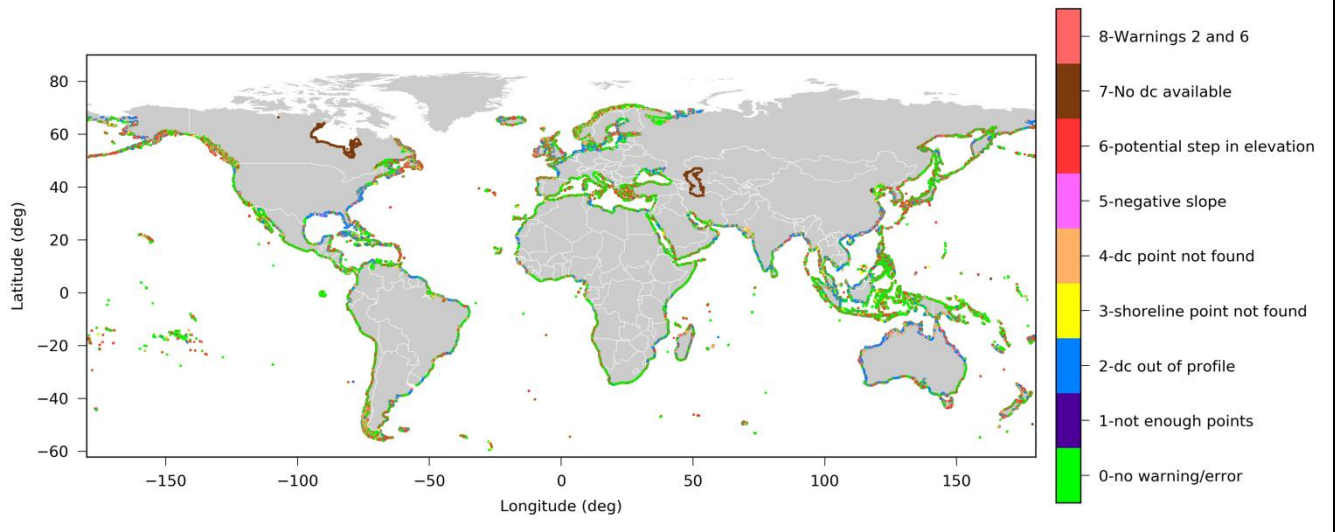

Figure S 1: Global map of error and warning tags. Tags 1,3,4,5 and 7 are error tags (i.e. failure of slope calculation) while tags 2, 6 and 8 are warning tags (i.e. imperfections in elevation profile).

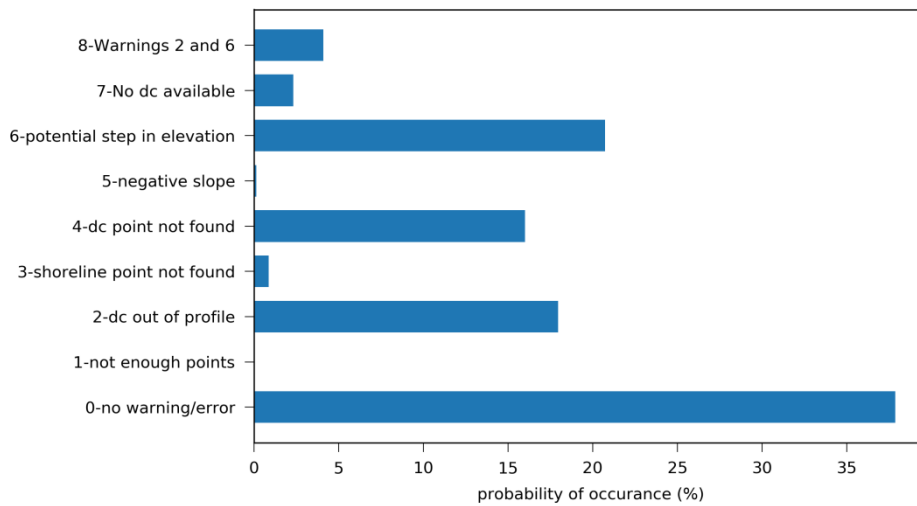

5 Figure S 2: Histogram of the probability of occurrence of each error/warning for all the transects.

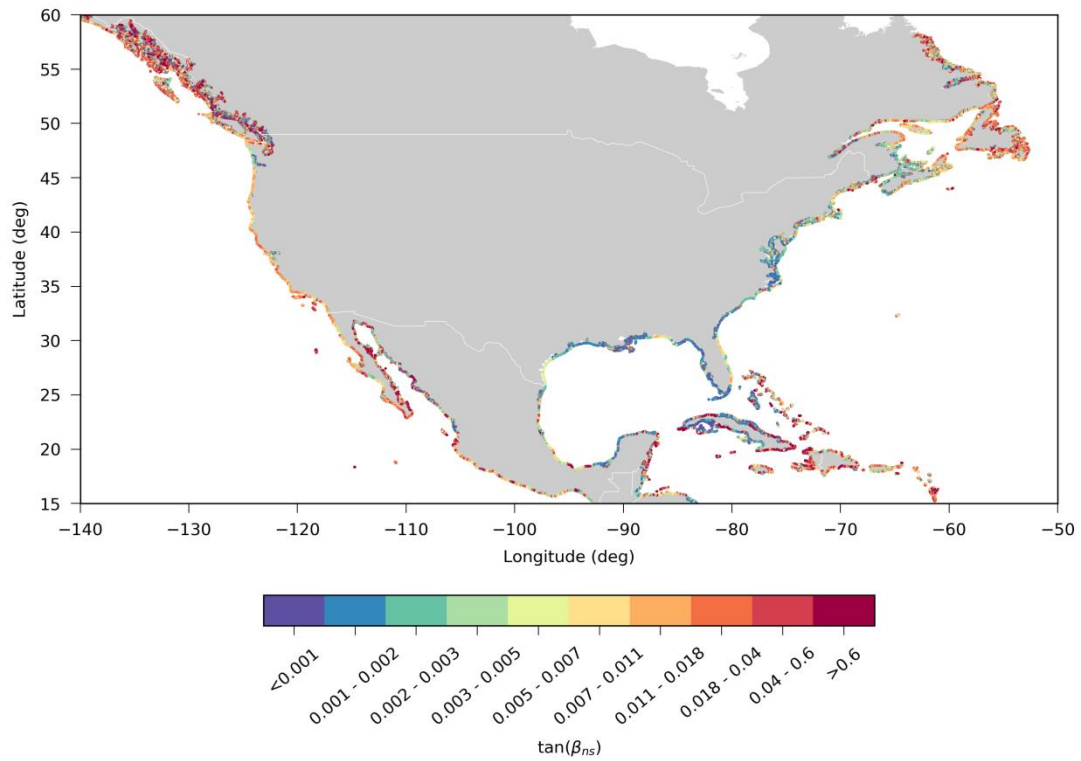

Figure S 3: Map of nearshore slopes for North America. Red colours indicate steeper slopes while blue colours milder slopes. Note that in the colour scale the slopes have been grouped in non-equidistant increments in order to highlight the spatial differences.

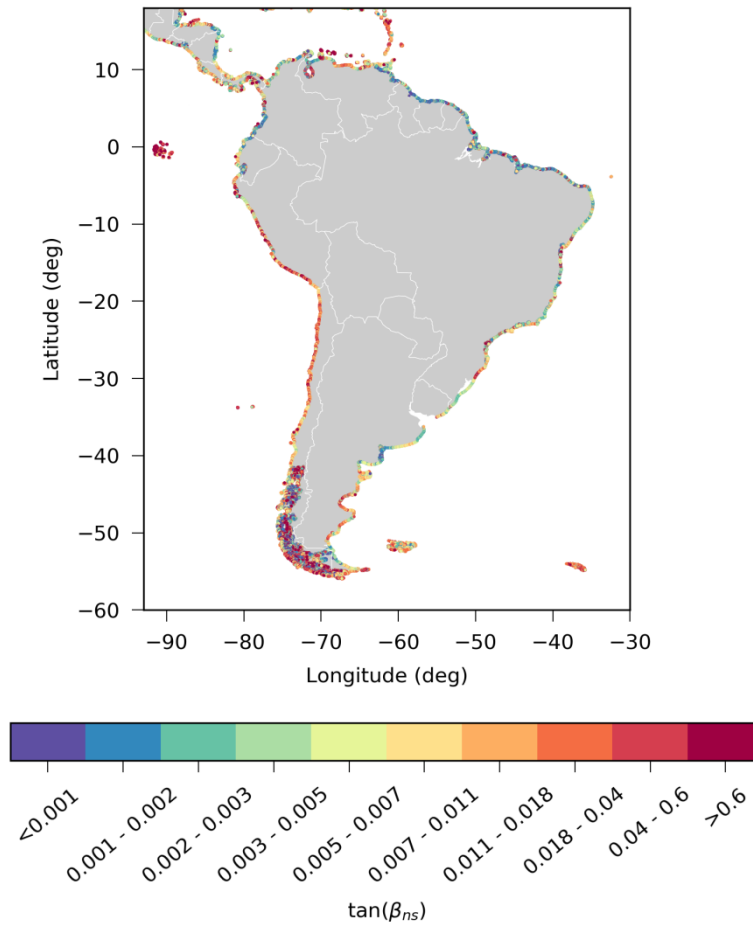

Figure S 4: Map of nearshore slopes for South America. Red colours indicate steeper slopes while blue colours milder slopes. Note that in the colour scale the slopes have been grouped in non-equidistant increments in order to highlight the spatial differences.

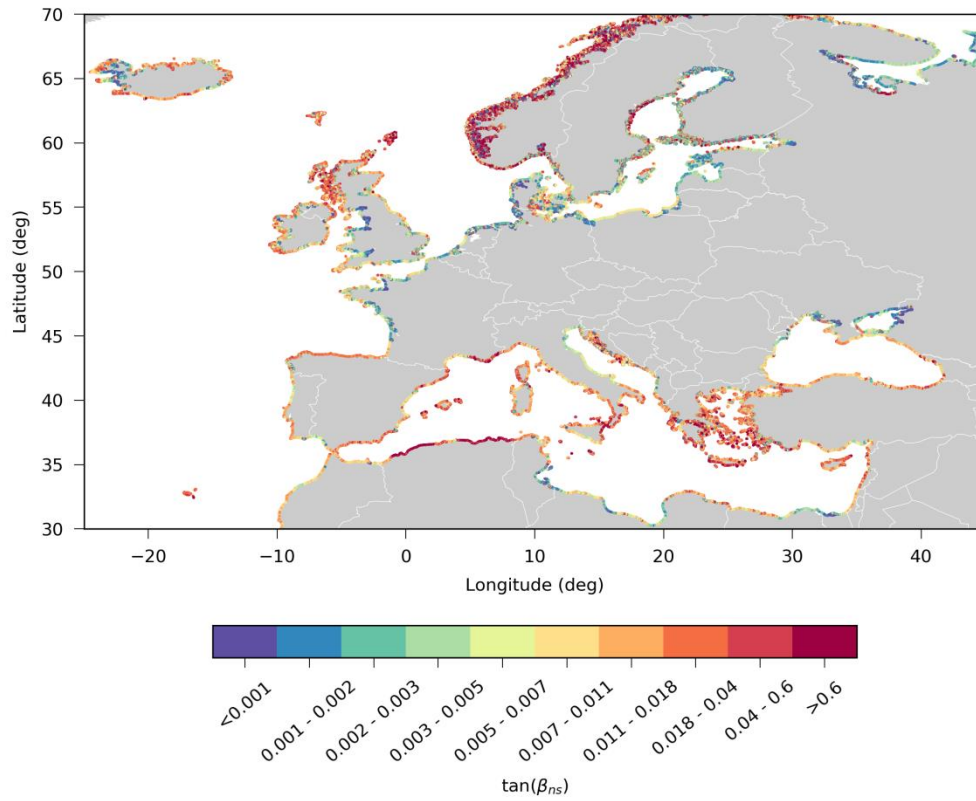

Figure S 5: Map of nearshore slopes for Europe. Red colours indicate steeper slopes while blue colours milder slopes. Note that in the colour scale the slopes have been grouped in non-equidistant increments in order to highlight the spatial differences.

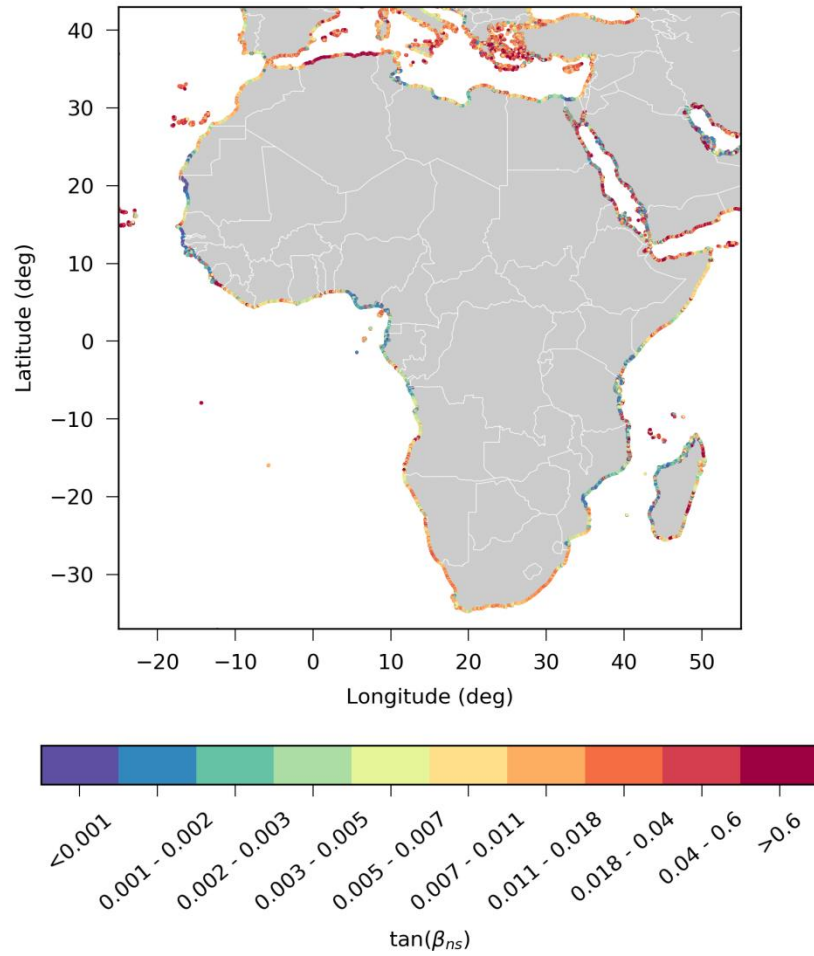

Figure S 6: Map of nearshore slopes for Africa. Red colours indicate steeper slopes while blue colours milder slopes. Note that in the colour scale the slopes have been grouped in non-equidistant increments in order to highlight the spatial differences.

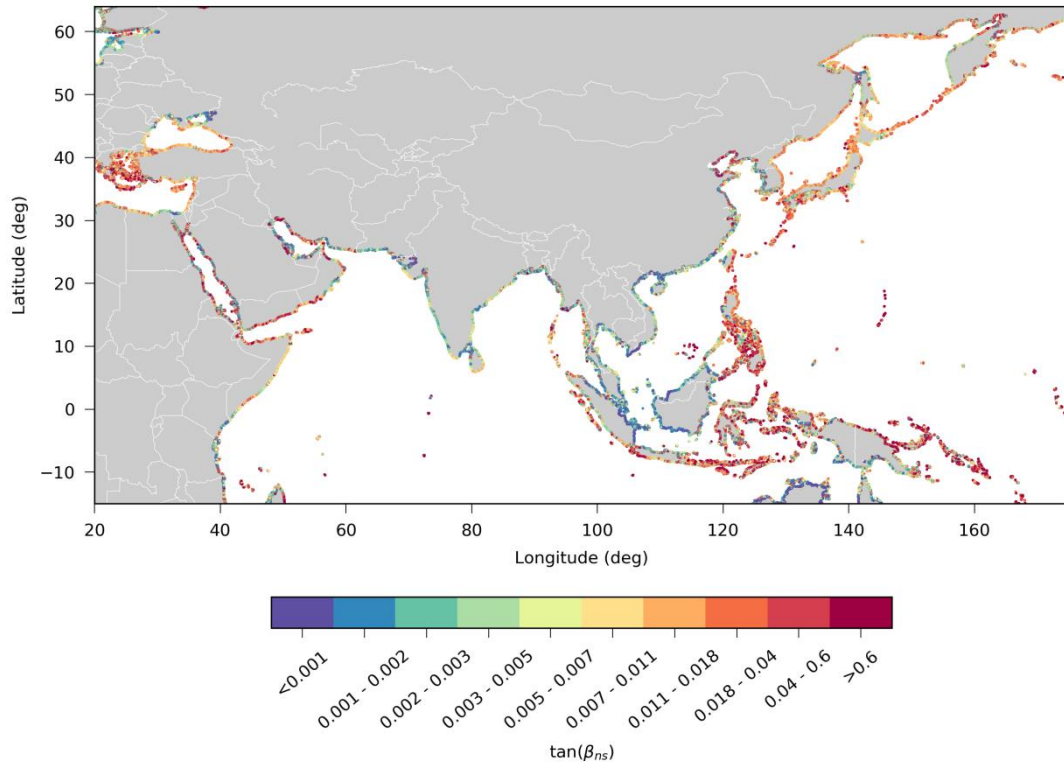

Figure S 7: Map of nearshore slopes for Asia. Red colours indicate steeper slopes while blue colours milder slopes. Note that in the colour scale the slopes have been grouped in non-equidistant increments in order to highlight the spatial differences.

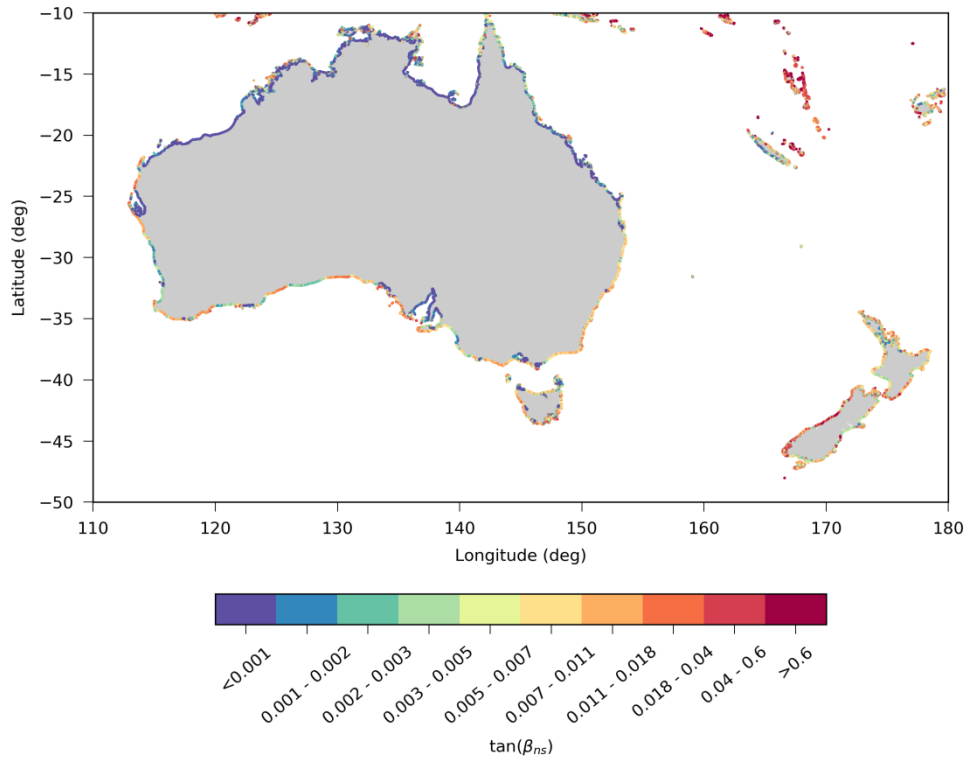

Figure S 8: Map of nearshore slopes for Oceania. Red colours indicate steeper slopes while blue colours milder slopes. Note that in the colour scale the slopes have been grouped in non-equidistant increments in order to highlight the spatial differences.

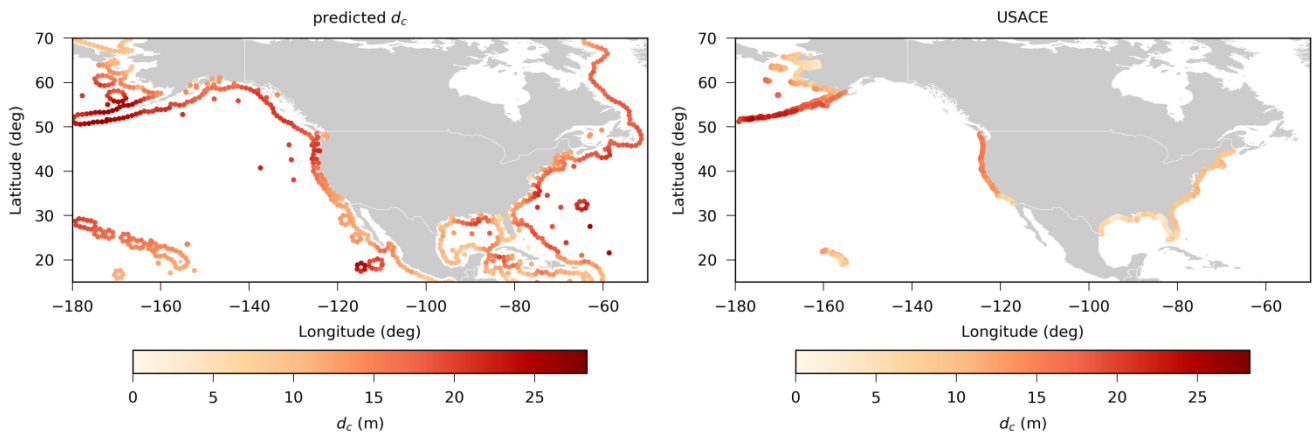

5

Figure S 9: Map of  $d_c$  calculated in the present study (left) versus the ones calculated at the U.S coast by USACE (Brutsché et al., 2016) (right).

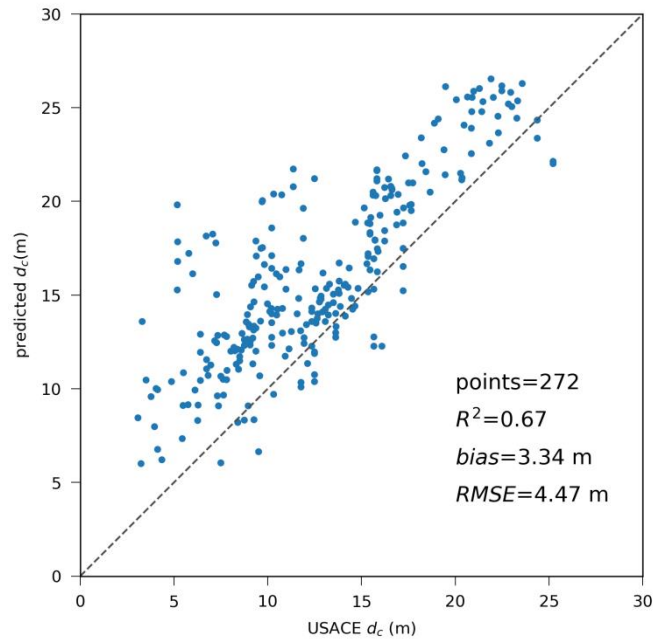

Figure S 10: Validation of the predicted  $d_c$  against the estimated  $d_c$  at the U.S coast by USACE (Brutsché et al., 2016). The validation was performed for the closest USACE point of each offshore point of the present study.

|    |                                                                                                                                             |
|----|---------------------------------------------------------------------------------------------------------------------------------------------|
| A  | Rocks and/or cliffs made of hard rocks (little subject to erosion) with eventual presence of a rock platform.                               |
| B  | Conglomerates and/or cliffs (example: chalk) i.e. subject to erosion: presence of rock waste and sediments (sand or pebbles) on the strand. |
| AC | Mainly rocky, little erodible, with pocket beaches (< 200 m long) not localised.                                                            |
| C  | Small beaches (200 to 1000 m long) separated by rocky capes (< 200 m long).                                                                 |
| D  | Developed beaches (length of the beach > 1 km) with strands made of coarse sediments: gravels or pebbles                                    |
| E  | Developed beaches (> 1 Km long) with strands fine to coarse sand.                                                                           |
| F  | Coastlines made of soft non-cohesive sediments (barriers, spits, tombolos).                                                                 |
| G  | Strands made of muddy sediments: "waddens" and intertidal marshes with "slikkes and schorres"                                               |
| H  | Estuary (virtual line).                                                                                                                     |
| J  | Harbour areas                                                                                                                               |
| K  | Artificial beaches                                                                                                                          |
| L  | Coastal embankments for construction purposes (e.g. by emplacement of rocks earth etc.)                                                     |
| M  | Polders (reclaimed coastal areas). Only used in CCEr database                                                                               |
| N  | Very narrow and vegetated strands (pond or lake shore type)                                                                                 |
| P  | Soft strands with rocky "platforms" (rocky flat) on intertidal strands                                                                      |
| R  | Soft strands with "beach rock" on intertidal strands                                                                                        |
| S  | Soft strands made of mine-waste sediments                                                                                                   |
| X  | Soft strands of heterogeneous category grain size                                                                                           |
| Y  | Artificial shoreline or shoreline with longitudinal protection works (walks, dikes, quays, rocky strands) without sandy strands             |
| Z  | Soft strands of unknown category grain size                                                                                                 |
|    |                                                                                                                                             |
|    | According to MCD                                                                                                                            |
| 1  | Sandy beaches                                                                                                                               |
| 2  | Unerodible (cliffs/rocks/human structures)                                                                                                  |
| 3  | Muddy coastlines/Estuaries                                                                                                                  |
| 4  | Rocky with pocket beaches                                                                                                                   |

5 Figure S 11: Reclassification of the 20 EUROSION (A-Z) geomorphological classes to the 4 MCD classes (1-4).
